# Supplementary material for: Automation Bias in AI-Assisted Detection of Cerebral Aneurysms on Time-of-Flight MR-Angiography
Source: bioRxiv or medRxiv preprint supplement (doi:10.1101/2024.05.31.24308021), 2024-06-03
Supplement: Supplementary file [file media-1.pdf]

| case_id | finding_id | Age Range | Evaluation of AI Finding | Diameter of AI Finding (in mm) | Location              | Description       |
|---------|------------|-----------|--------------------------|--------------------------------|-----------------------|-------------------|
| A01     | A01_1      | 41 – 45   | False Positive           | 2.6                            | Right M1 segment      | Infundibulum      |
| A02     | A02_1      | 51 – 55   | True Positive            | 2.8                            | Left MCA bifurcation  | Saccular aneurysm |
| A03     | A03_1      | 51 – 55   | True Positive            | 3.7                            | Right MCA bifurcation | Saccular aneurysm |
| A03     | A03_2      | 51 – 55   | False Positive           | 1.7                            | Left M1 segment       | Infundibulum      |
| A04     | A04_2      | 56 – 60   | False Positive           | 1.3                            | Left M2               | Vascular loop     |
| A05     | A05_1      | 51 – 55   | True Positive            | 4.6                            | Right ICA             | Saccular aneurysm |
| A06     | A06_1      | 71 – 75   | False Positive           | 2.8                            | Right ICA             | Infundibulum      |
| A07     | A07_1      | 66 – 70   | True Positive            | 3.9                            | Right ICA             | Saccular aneurysm |
| A08     | A08_1      | 81 – 85   | True Positive            | 2.5                            | Acom                  | Saccular aneurysm |
| A09     | A09_1      | 76 - 80   | True Positive            | 4.7                            | Acom                  | Saccular aneurysm |
| A09     | A09_2      | 76 – 80   | True Positive            | 3.0                            | Right MCA bifurcation | Saccular aneurysm |
| A10     | A10_1      | 71 – 75   | False Positive           | 2.9                            | Acom                  | Acom fenestration |
| B01     | B01_1      | 76 – 80   | False Positive           | 1.4                            | Right ICA             | Vascular loop     |
| B02     | B02_1      | 16 – 20   | False Positive           | 2.2                            | Left M2               | Vascular loop     |
| B03     | B03_1      | 71 – 75   | True Positive            | 5.6                            | Left MCA bifurcation  | Saccular aneurysm |
| B03     | B03_2      | 71 – 75   | True Positive            | 3.7                            | Left ICA              | Saccular aneurysm |
| B04     | B04_1      | 56 – 60   | True Positive            | 3.1                            | Left MCA bifurcation  | Fusiform aneurysm |
| B05     | B05_1      | 31 – 35   | False Positive           | 1.5                            | Left M1               | Perforator        |
| B06     | B06_1      | 26 – 30   | False Positive           | 2.0                            | Left M1               | Perforator        |
| B07     | B07_1      | 31 – 35   | True Positive            | 4.0                            | Left ICA              | Saccular aneurysm |
| B08     | B08_1      | 26 – 30   | False Positive           | 1.2                            | Acom                  | Vascular loop     |
| B09     | B09_1      | 56 – 60   | True Positive            | 4.0                            | Left MCA bifurcation  | Saccular aneurysm |
| B10     | B10_1      | 31 – 35   | False Positive           | 2.2                            | Left MCA bifurcation  | Vascular loop     |

*Supplement 1: Overview of AI-positive findings.*
